# Supplementary material
Source: Royal Society of Chemistry journal article supplement (doi:10.1039/d6tc00555a)
Supplement: d6tc00555a1.pdf [file d6tc00555a1.pdf]

## *Supporting Information*

### **Alkali-metal-activated perovskite quantum dots glasses for high-efficiency and long-term stable luminescent solar concentrators**

Yuqing Wang<sup>1</sup>, Xiya Gao<sup>1</sup>, Jing Li<sup>1</sup>, Mingming Zhang<sup>1,2,\*</sup>, Kang Liu<sup>1</sup>, Jixiang Xu<sup>1</sup>,  
Zhanchao Wu<sup>1,\*</sup>, Lei Wang<sup>1</sup>, Jun Xing<sup>1,\*</sup>

<sup>1</sup>Key Laboratory of Eco-chemical Engineering, Ministry of Education, College of Chemistry and Molecular Engineering, Qingdao University of Science & Technology, Qingdao 266042, China.

<sup>2</sup>College of Sino-German Science and Technology, Qingdao University of Science & Technology, Qingdao 266042, China.

\*Correspondence: xingjun@qust.edu.cn (J.X.), wuzhan\_chao@163.com (Z.W.), zmm@qust.edu.cn (M.Z.)

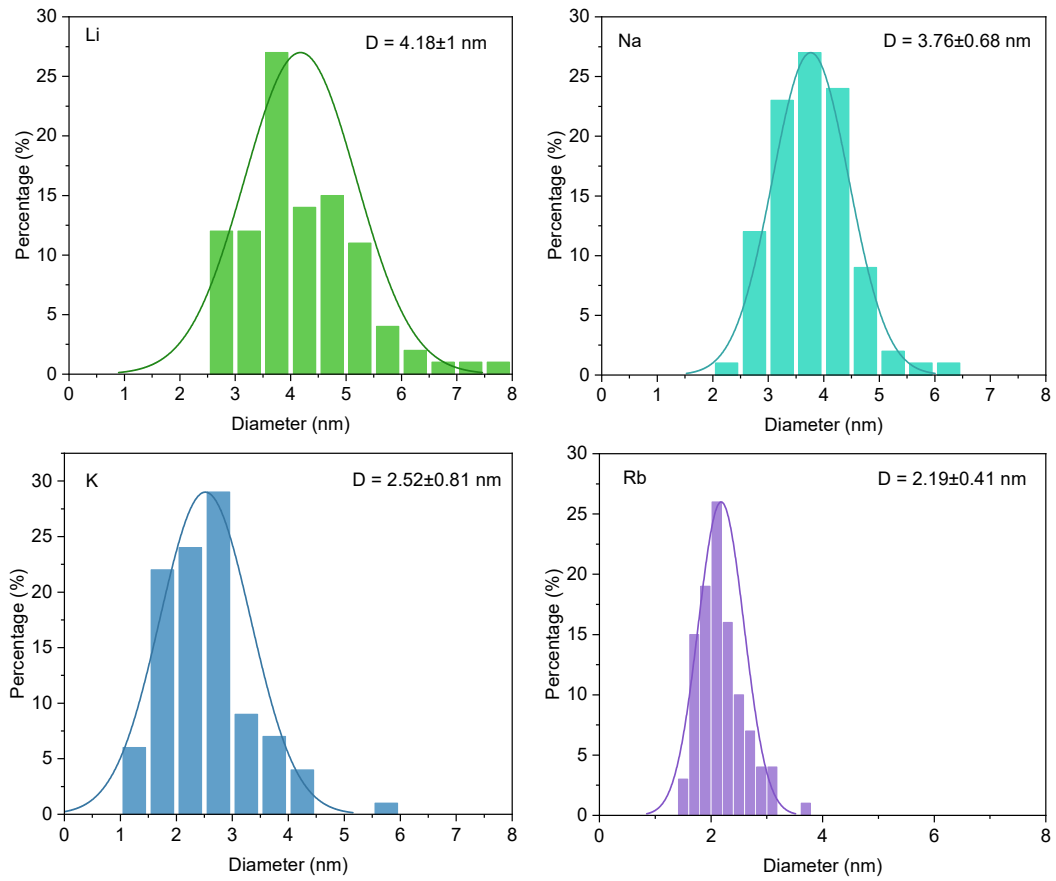

**Figure S1.** The particle size distribution of PQDs in glass samples.

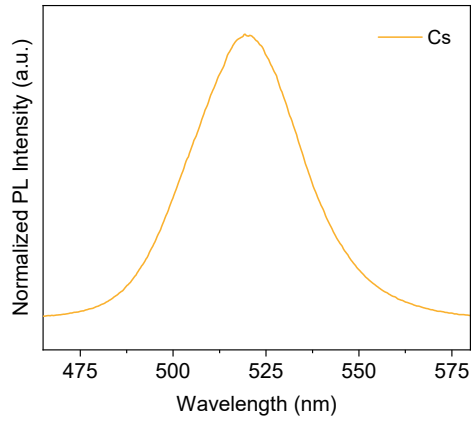

**Figure S2.** PL spectrum of Cs-activated CsPbBr<sub>3</sub> QDs glass.

A Cs-activated CsPbBr<sub>3</sub> QDs glass sample was prepared using the composition 93B<sub>2</sub>O<sub>3</sub>-93SiO<sub>2</sub>-60ZnO-5CaF<sub>2</sub>-12Cs<sub>2</sub>CO<sub>3</sub>-5PbBr<sub>2</sub>-15CsBr under the same conditions. It shows an orange appearance with a PLQY of 12% and a PL peak at 520 nm. Compared with the Cs-activated sample, the Li- and Na-activated CsPbBr<sub>3</sub> QDs glass samples exhibit no shift in their PL peaks, both remaining at approximately 520 nm. This demonstrates that Li<sup>+</sup> and Na<sup>+</sup> do not incorporate into the crystal lattice of CsPbBr<sub>3</sub> QDs.

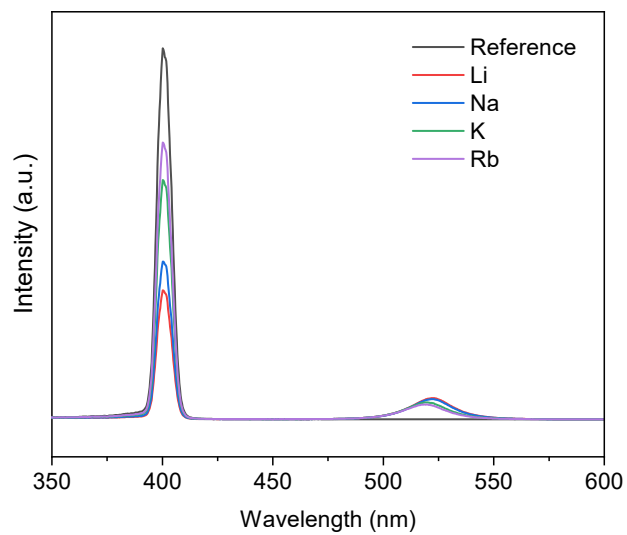

**Figure S3.** The PLQY spectra of Li-, Na-, K-, and Rb-activated PQDs glasses.

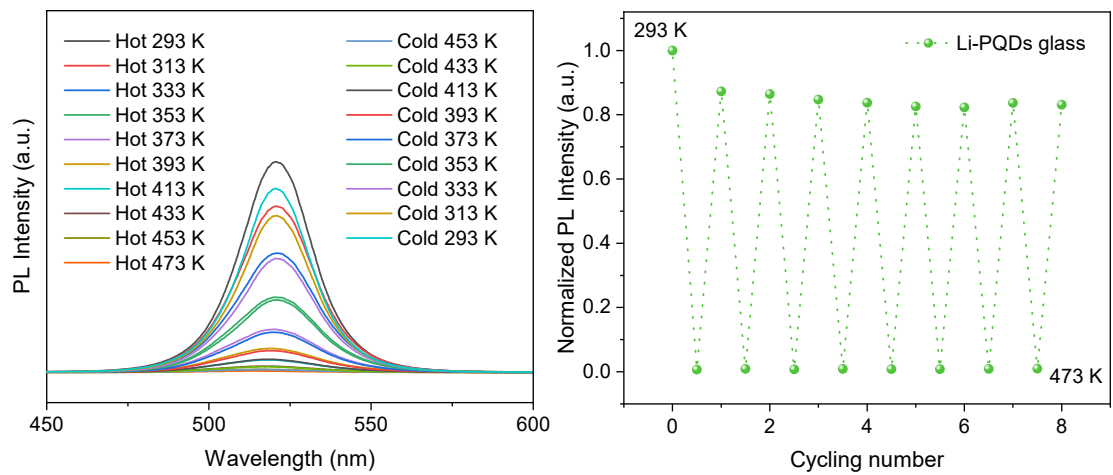

**Figure S4.** The PL intensity of Li-activated CsPbBr<sub>3</sub> QDs glass under cyclic thermal stability test.

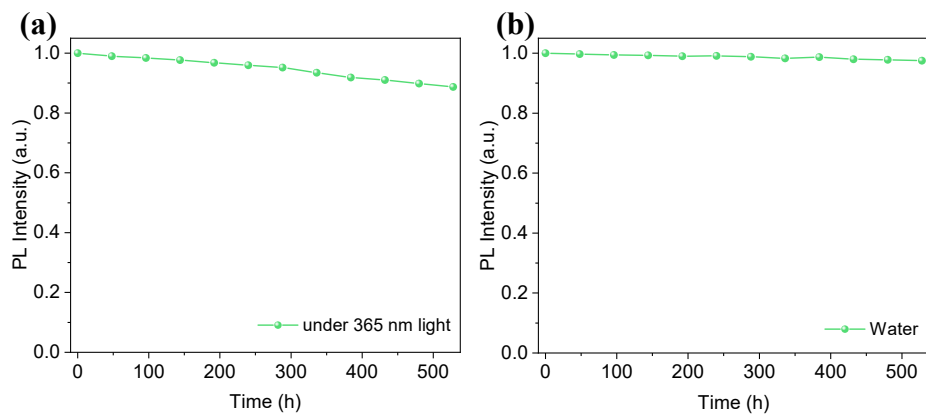

**Figure S5.** PL intensity of Li-activated CsPbBr<sub>3</sub> QDs glass under a 365 nm LED light (a) and in water (b) for 500 hours.

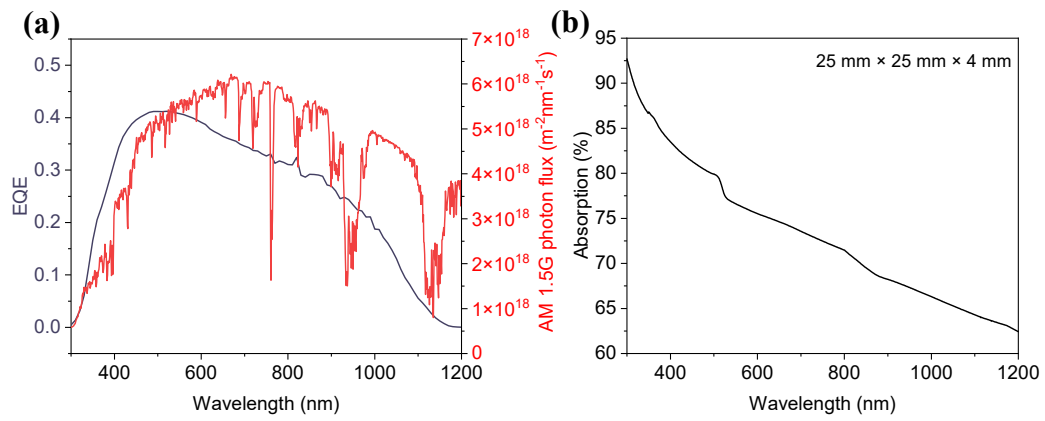

**Figure S6.** (a) The EQE spectrum (blue line) of the Si-cell and the solar spectrum (red line). (b) The UV-vis absorption spectrum of the LSC (25 mm  $\times$  25 mm  $\times$  4 mm) and 73% of the total solar photon flux is absorbed by the LSC device.

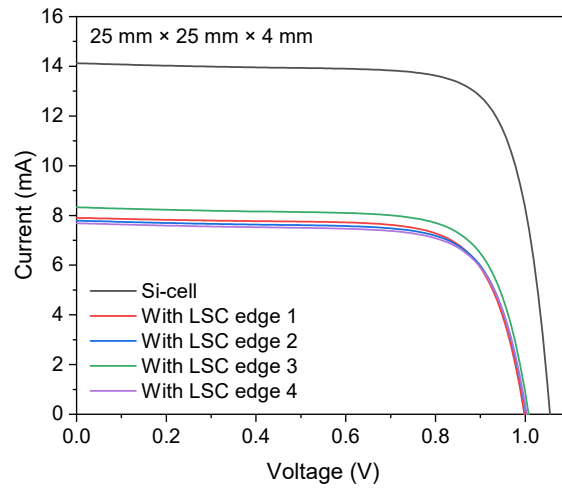

**Figure S7.** I-V curves of the Si-cell without and with coupling to the four edges of PQDs glass LSC device (25 mm × 25 mm × 4 mm).

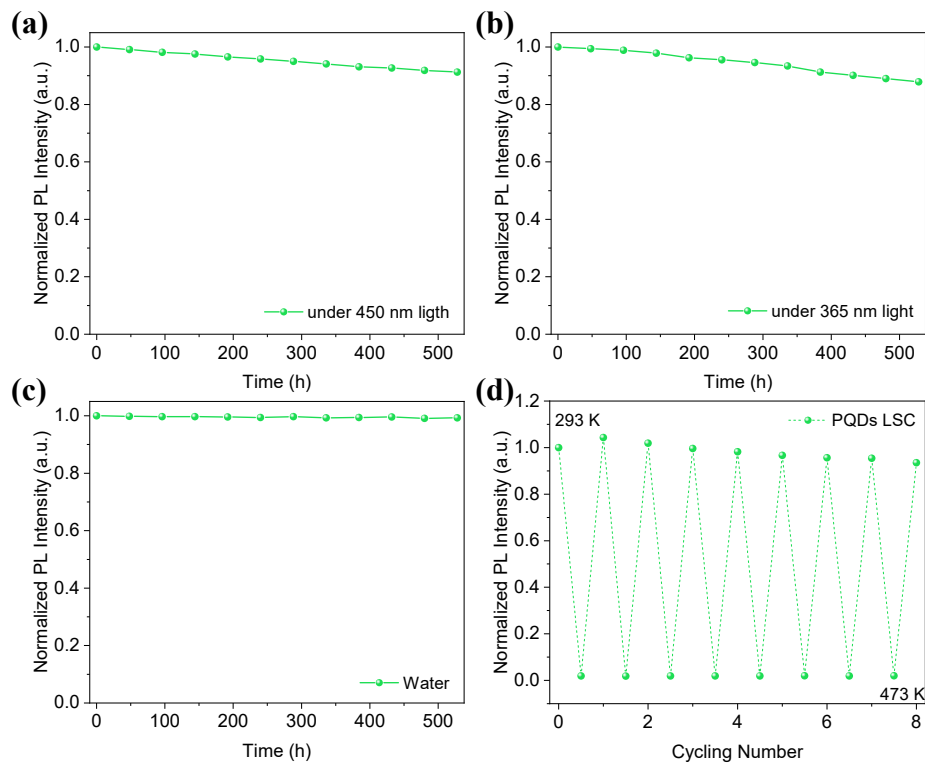

**Figure S8.** Stability characterization of PQDs LSC: PL intensity evolution of PQDs LSC (a) under 450 nm illumination for 500 h, (b) under 365 nm illumination for 500 h, (c) after 500 h immersion in water, and (d) over 8 thermal cycles between 293 K and 473 K.

**Table S1.** PL lifetime of CsPbBr<sub>3</sub> PQDs glass with different alkali metal ions addition.

| Addition | $\tau_1$ (ns) | $A_1$ | $\tau_2$ (ns) | $A_2$ | $\tau_3$ (ns) | $A_3$ | $\tau_{\text{avg}}$ (ns) | $R^2$ |
|----------|---------------|-------|---------------|-------|---------------|-------|--------------------------|-------|
| LiBr     | 5.82          | 0.55  | 24.42         | 0.37  | 137.38        | 0.09  | 78.05                    | 0.99  |
| NaBr     | 4.78          | 0.51  | 20.34         | 0.38  | 113.16        | 0.10  | 68.55                    | 0.99  |
| KBr      | 4.35          | 0.45  | 19.24         | 0.41  | 105.55        | 0.10  | 63.11                    | 0.99  |
| RbBr     | 0.79          | 0.11  | 7.45          | 0.72  | 35.59         | 0.16  | 21.62                    | 0.99  |

**Table S2.** XPS Cs 3d, Pb 4f and Br 3d spectrum binding energy of all samples.

| Addition | Peak fitting         | Binding energy (eV) |
|----------|----------------------|---------------------|
| control  | Cs 3d <sub>5/2</sub> | 726.96              |
|          | Cs 3d <sub>3/2</sub> | 740.92              |
|          | Pb 4f <sub>7/2</sub> | 143.19              |
|          | Pb 4f <sub>5/2</sub> | 147.46              |
|          | Br 3d <sub>5/2</sub> | 69.99               |
|          | Br 3d <sub>3/2</sub> | 72.16               |
| LiBr     | Cs 3d <sub>5/2</sub> | 726.36              |
|          | Cs 3d <sub>3/2</sub> | 740.34              |
|          | Pb 4f <sub>7/2</sub> | 143.28              |
|          | Pb 4f <sub>5/2</sub> | 147.53              |
|          | Br 3d <sub>5/2</sub> | 70.20               |
|          | Br 3d <sub>3/2</sub> | 72.61               |
| NaBr     | Cs 3d <sub>5/2</sub> | 726.56              |
|          | Cs 3d <sub>3/2</sub> | 740.53              |
|          | Pb 4f <sub>7/2</sub> | 143.34              |
|          | Pb 4f <sub>5/2</sub> | 147.43              |
|          | Br 3d <sub>5/2</sub> | 70.15               |
|          | Br 3d <sub>3/2</sub> | 72.42               |
| KBr      | Cs 3d <sub>5/2</sub> | 726.17              |
|          | Cs 3d <sub>3/2</sub> | 740.17              |

**Table S2.** XPS Cs 3d, Pb 4f and Br 3d spectrum binding energy of all samples.

| Addition | Peak fitting         | Binding energy (eV) |
|----------|----------------------|---------------------|
| KBr      | Pb 4f <sub>7/2</sub> | 143.45              |
|          | Pb 4f <sub>5/2</sub> | 147.60              |
|          | Br 3d <sub>5/2</sub> | 70.34               |
|          | Br 3d <sub>3/2</sub> | 72.72               |
| RbBr     | Cs 3d <sub>5/2</sub> | 726.96              |
|          | Cs 3d <sub>3/2</sub> | 740.93              |
|          | Pb 4f <sub>7/2</sub> | 143.78              |
|          | Pb 4f <sub>5/2</sub> | 147.97              |
|          | Br 3d <sub>5/2</sub> | 70.61               |
|          | Br 3d <sub>3/2</sub> | 73.02               |

**Table S3.** The normalized composition of the as-prepared glass.

| Component | B <sub>2</sub> O <sub>3</sub> | SiO <sub>2</sub> | ZnO   | CaF <sub>2</sub> | Cs <sub>2</sub> CO <sub>3</sub> | PbBr <sub>2</sub> | XBr  | Tota |
|-----------|-------------------------------|------------------|-------|------------------|---------------------------------|-------------------|------|------|
|           |                               |                  |       |                  |                                 |                   |      | 1    |
| mol%      | 32.86                         | 32.86            | 21.20 | 1.77             | 4.24                            | 1.77              | 5.30 | 100  |

**Table S4.** Performance of the Si-cell without and with coupling to the four edges of the PQDs glass LSC device (25 mm × 25 mm × 4 mm).

|                 | V <sub>OC</sub> (V) | J <sub>SC</sub> (mA cm <sup>-2</sup> ) | FF (%) | η (%) | η <sub>opt</sub> (%) | PCE (%) |
|-----------------|---------------------|----------------------------------------|--------|-------|----------------------|---------|
|                 |                     | 2)                                     |        |       |                      |         |
| Si-cell         | 1.05                | 14.13                                  | 0.77   | 11.52 | /                    | /       |
| With LSC edge 1 | 1.00                | 7.91                                   | 0.74   | 5.85  | 35.83                | 0.92    |
| With LSC edge 2 | 1.00                | 7.79                                   | 0.74   | 5.80  | 35.34                | 0.92    |
| With LSC edge 3 | 1.00                | 8.32                                   | 0.74   | 6.22  | 37.74                | 0.98    |
| With LSC edge 4 | 1.00                | 7.68                                   | 0.74   | 5.72  | 34.84                | 0.90    |

## Supplementary Note 1–Determination of internal and external optical quantum efficiencies ( $\eta_{\text{int}}$ and $\eta_{\text{ext}}$ ) of a coupled LSC/Si-cell system.

The  $\eta_{\text{int}}$  of the perovskite LSC device is defined as the ratio of the number of photons emitted from the edge of the LSC to the number of photons absorbed by the LSC. It can be calculated using the following formula:

$$\eta_{\text{int}} = \frac{J_{\text{LSC}} \times Q_{\text{Total}}}{G \times J_{\text{SC}} \times Q_{\text{PL}} \times \eta_{\text{abs}}}$$

where  $G$  is the geometric gain factor, defined as  $G = A_{\text{surface}}/A_{\text{edge}}$ .  $J_{\text{SC}}$  and  $J_{\text{LSC}}$  represent the photogenerated current densities of the Si cell without and with coupling with the LSC edge, respectively.  $Q_{\text{Total}}$  and  $Q_{\text{PL}}$  are the average external quantum efficiencies (EQEs) of the Si cell over the entire solar spectrum and at the wavelength range around the PL peak of the perovskite LSC film, respectively.  $\eta_{\text{abs}}$  denotes the absorbance of the perovskite LSC under total solar flux. Here, the  $J_{\text{LSC}}/J_{\text{SC}}$  of the 25 mm  $\times$  25 mm  $\times$  4 mm PQDs LSC device is 58.86%.  $Q_{\text{Total}}$  and  $Q_{\text{PL}}$  are 0.53 and 0.41, respectively. Consequently, the  $\eta_{\text{int}}$  is 66.8%.

In addition, the  $\eta_{\text{ext}}$  is defined as the ratio of the number of photons emitted from the LSC edges to the number of total incident photons. It can be expressed as follows:

$$\eta_{\text{ext}} = \frac{J_{\text{LSC}} \times Q_{\text{Total}}}{G \times J_{\text{SC}} \times Q_{\text{PL}}}$$

Consequently, the  $\eta_{\text{ext}}$  is 46.8%.
